# Supplementary material for: Creation and luminescence of size-selected gold nanorods
Source: Royal Society of Chemistry journal article supplement (doi:10.1039/c2nr30324h), 2012-01-01
Supplement: c2nr30324h.pdf [file c2nr30324h.pdf]

Cite this: DOI: 10.1039/c0xx00000x

www.rsc.org/xxxxxx

ARTICLE TYPE

## Creation and Luminescence of Size-selected Gold Nanorods

Y. Chen,<sup>\*a</sup> Y. Zhang,<sup>a</sup> D. J. S. Birch<sup>a</sup> and A. S. Barnard<sup>b</sup>

### 5 Electronic Supplementary Information

25

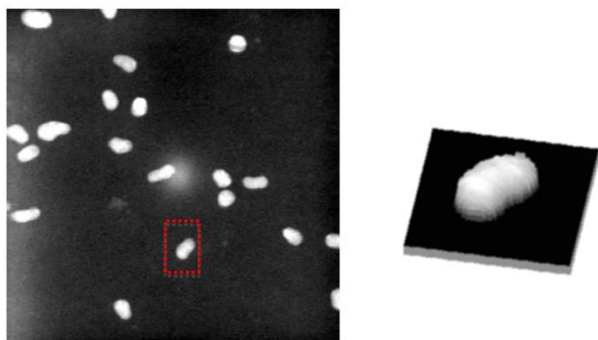

**Fig. S1** Electron micrograph taken from Au<sub>8860</sub> nanoparticles on an amorphous carbon TEM support using scanning transmission electron microscopy with a high angle annular dark field detector and an intensity 3D plot of one particle as labelled.

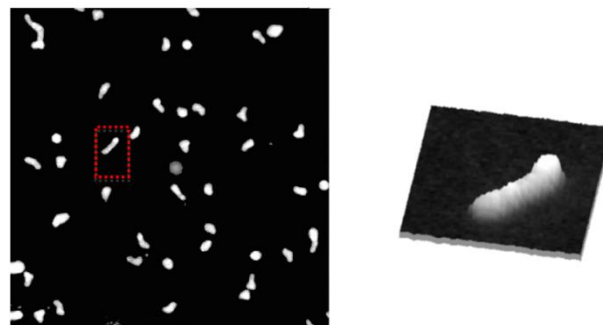

**Fig. S1** Electron micrograph taken from Au<sub>15000</sub> nanoparticles on an amorphous carbon TEM support using scanning transmission electron microscopy with a high angle annular dark field detector and an intensity 3D plot of one particle as labelled.

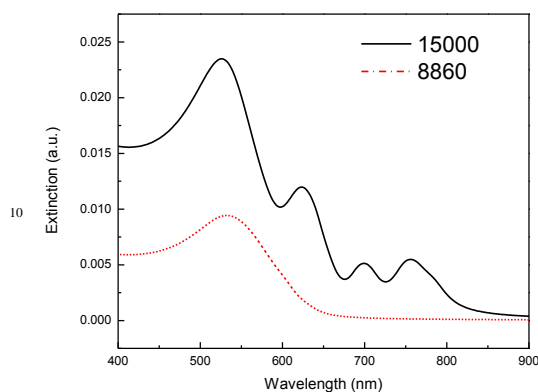

**Fig. S2a** Calculated extinction spectra of Au<sub>15000</sub> and Au<sub>8860</sub> nanocluster ensembles with aspect ratio distributions as shown in fig. 1b and fig. 2c.

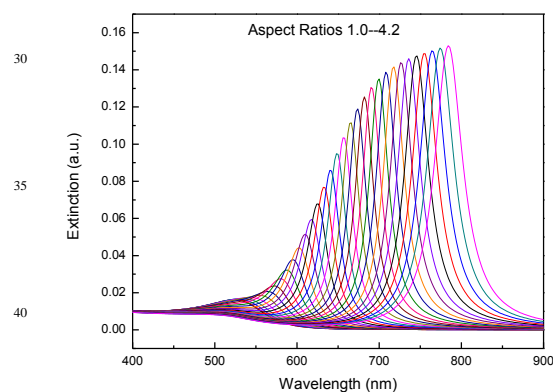

**Fig. S2b** Calculated extinction spectra of elongated ellipsoid with varying aspect ratios and sphere using Mie theory in the dipole approximation [SR1] with dielectric function of gold from SR2.

### 15 Notes and references

SR1. S. Link, M. B. Mohamed, and M. A. El-Sayed, *J. Phys. Chem. B* 1999, **103**, 3073.

SR2. F. Hao, and P. Nordlander, *Chem. Phys. Lett.* 2007, **446**, 115.

<sup>50</sup> <sup>a</sup> *Photophysics Group, Centre for Molecular Nanometrology, Department of Physics, SUPA, University of Strathclyde, John Anderson Building, 107 Rottenrow, Glasgow, G4 0NG, UK. Fax: +44 141 5522891; Tel: +44 141 5483087; E-mail: y.chen@strath.ac.uk*

<sup>55</sup> <sup>b</sup> *Virtual Nanoscience Laboratory, CSIRO Materials Science & Engineering, Clayton, 3168, Australia. Fax: +61-3-9545-2059; Tel: +61-4-9545-7840; E-mail: amanda.barnrd@csiro.au*

20
